# Supplementary material for: Synthesis and Characterization of Functional Cellulose–Ether-Based PCL- and PLA-Grafts-Copolymers
Source: MDPI journal article supplement (doi:10.3390/polym15020455), 2023-01-15
Supplement: s1 [file s1]

## Supporting Information

# Synthesis and Characterization of Functional Cellulose–Ether-Based PCL- and PLA-Grafts-Copolymers

Korbinian Sommer, Daniel Van Opdenbosch and Cordt Zollfrank \*

Chair for Biogenic Polymers, TUM Campus Straubing for Biotechnology and Sustainability, Technical University of Munich, 94315 Straubing, Germany

\* Correspondence: cordt.zollfrank@tum.de

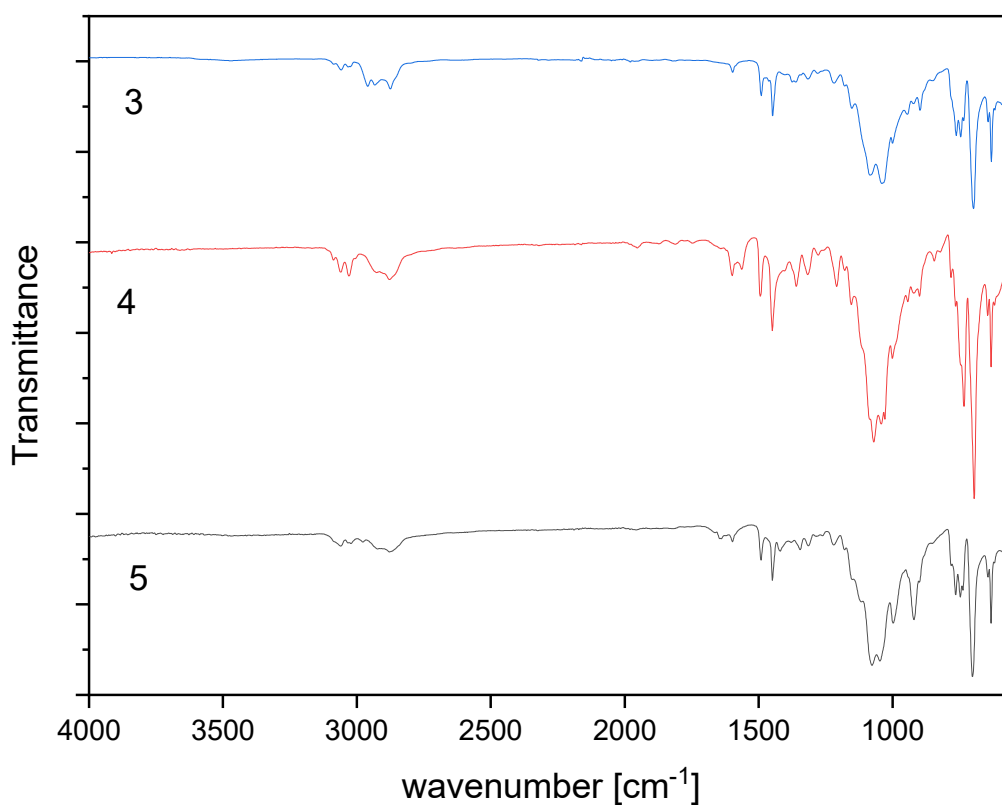

**Figure S1.** Fourier transform infrared spectra of 6-O-trityl-protected cellulose derivatives.

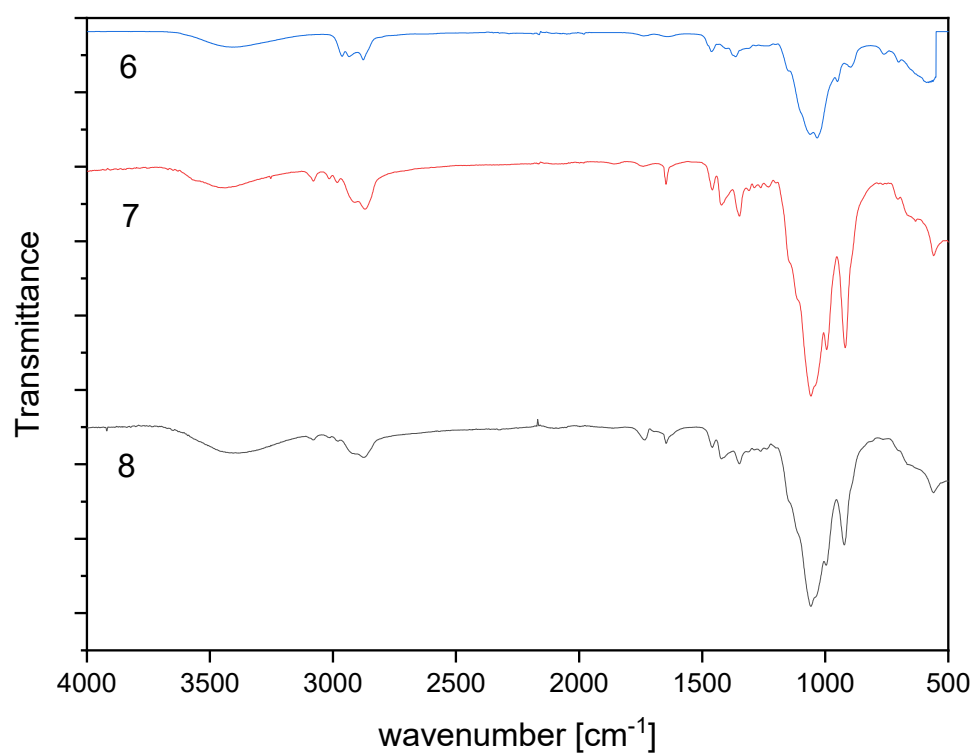

**Figure S2.** FTIR-spectra of macroinitiators **6**, **7** and **8**.

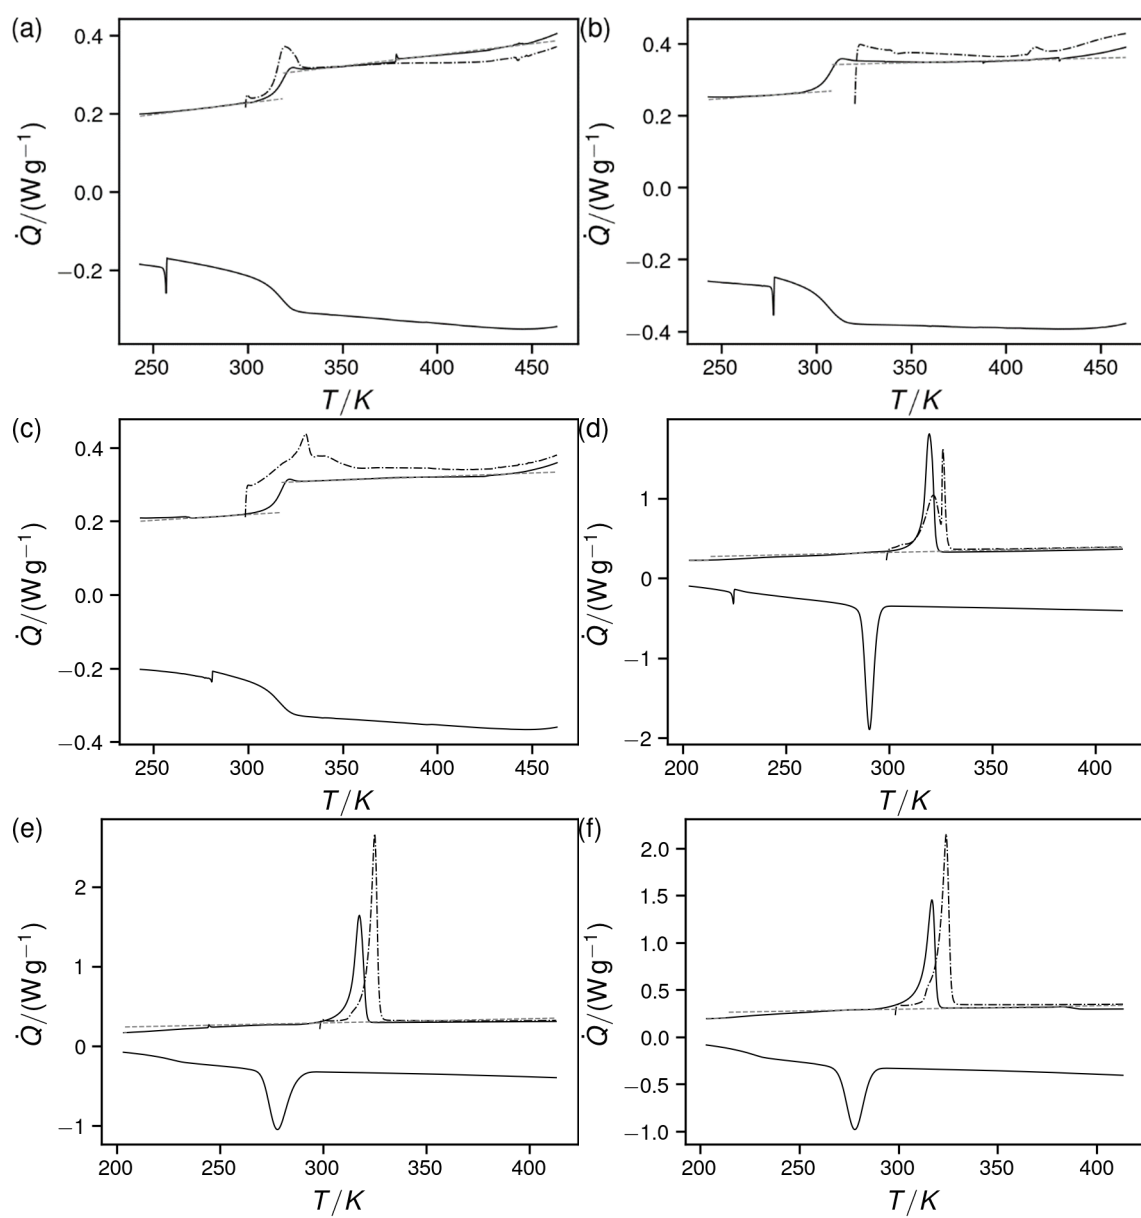

**Figure S3.** DSC traces of compounds 9 (a), 10 (b), 11 (c), 12 (d), 13 (e), 14 (f).

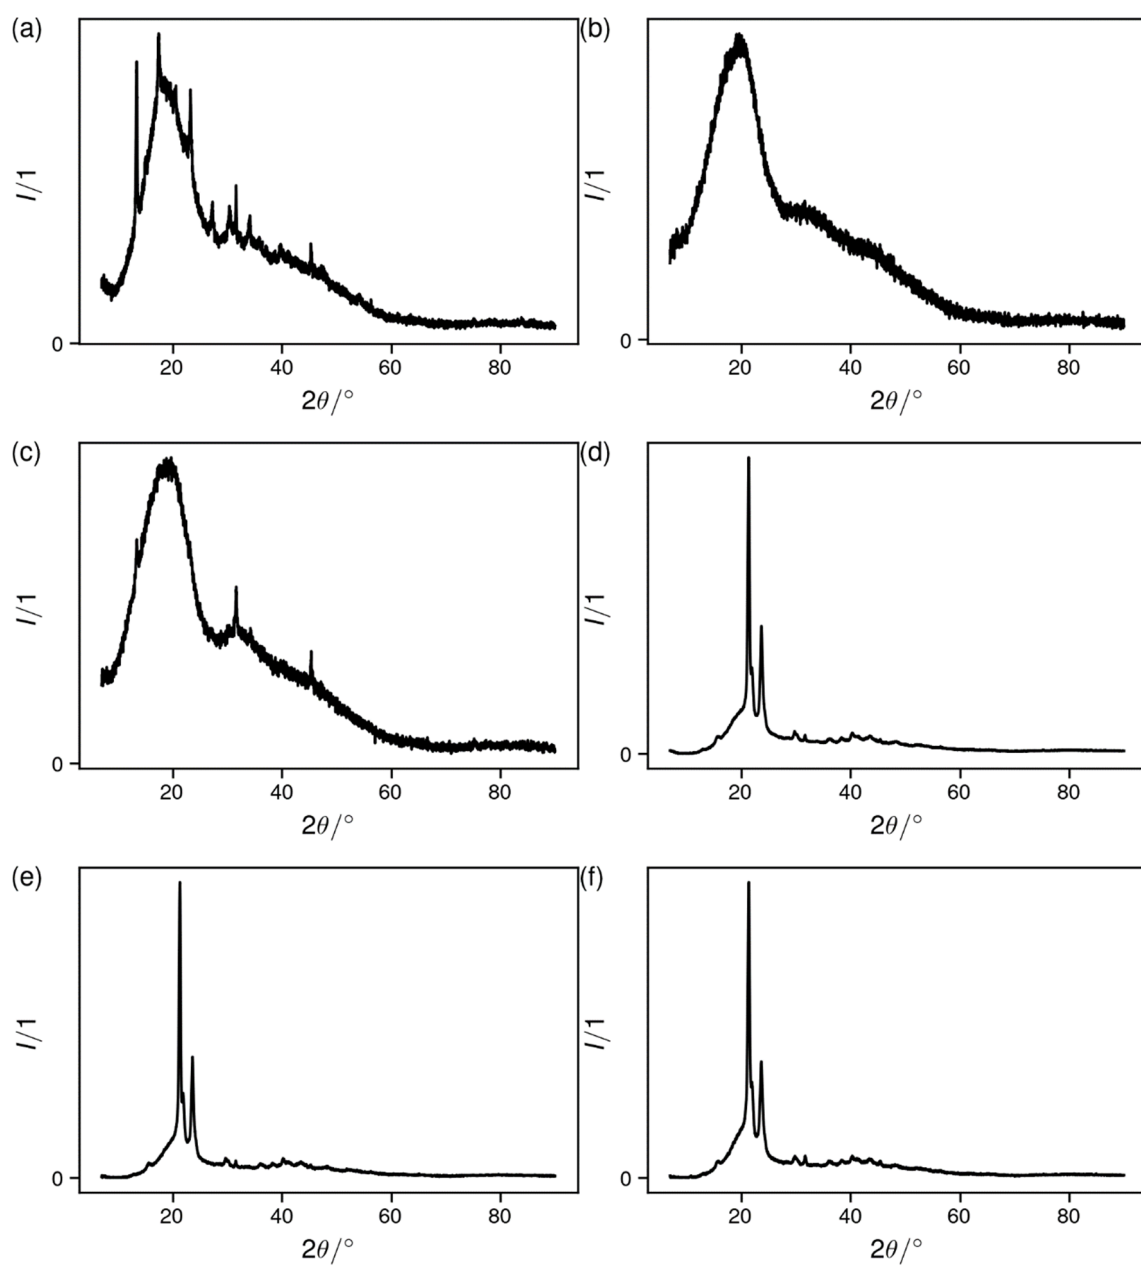

**Figure S4.** X-ray diffractograms of the compounds 9 (a), 10 (b), 11 (c), 12 (d), 13 (e), 14 (f).
